# Supplementary material
Source: publisher figshare collection journal article supplement (https://gsapubs.figshare.com/ndownloader/files/30645777)
Supplement: Supplementary file 1 [file 30645777]

## Sheet: Partition_coefficients
	Rb	Ba	Th	U	Nb	Ta	La	Ce	Sr	Nd	Zr	Sm	Eu	Gd	Dy	Er	Yb	Y	Lu
Plagioclase	0.0927939	1.12343	0.134977	0.134469	0.177353	0.112917	0.20053	0.194568	10.2926	0.174653	0.0965745	0.151021	1.3133	0.128459	0.105891	0.0870742	0.0728583	0.0991792	0.0672993
Ilmenite			0.427	0.063	65.6	18	1.31	1.19	0.415	0.96	6.19	0.684	0.4	0.38	0.37		0.55	0.315	0.74

## Sheet: G49287
Kendrick, J., Duguet, M., and Yakymchuk, C., 2021, Diversification of Archean tonalite-trondhjemite-granodiorite suites in a mushy middle crust: Geology, https://doi.org/10.1130/G49287.1
